# Supplementary material for: Effects of Higher Normal Blood Pressure on Brain Are Detectable before Middle-Age and Differ by Sex
Source: MDPI journal article supplement (doi:10.3390/jcm11113127), 2022-05-31
Supplement: s1 [file s1]

## Supplement

**Title:** Effects of higher normal blood pressure on brain are detectable before middle-age and differ by sex.

Khawlah Alateeq, Centre for Research on Ageing, Health and Wellbeing, 54 Mills Road, Australian National University, Canberra, ACT 2601, Australia.

Email: [Khawlah.alateeq@anu.edu.au](mailto:Khawlah.alateeq@anu.edu.au)

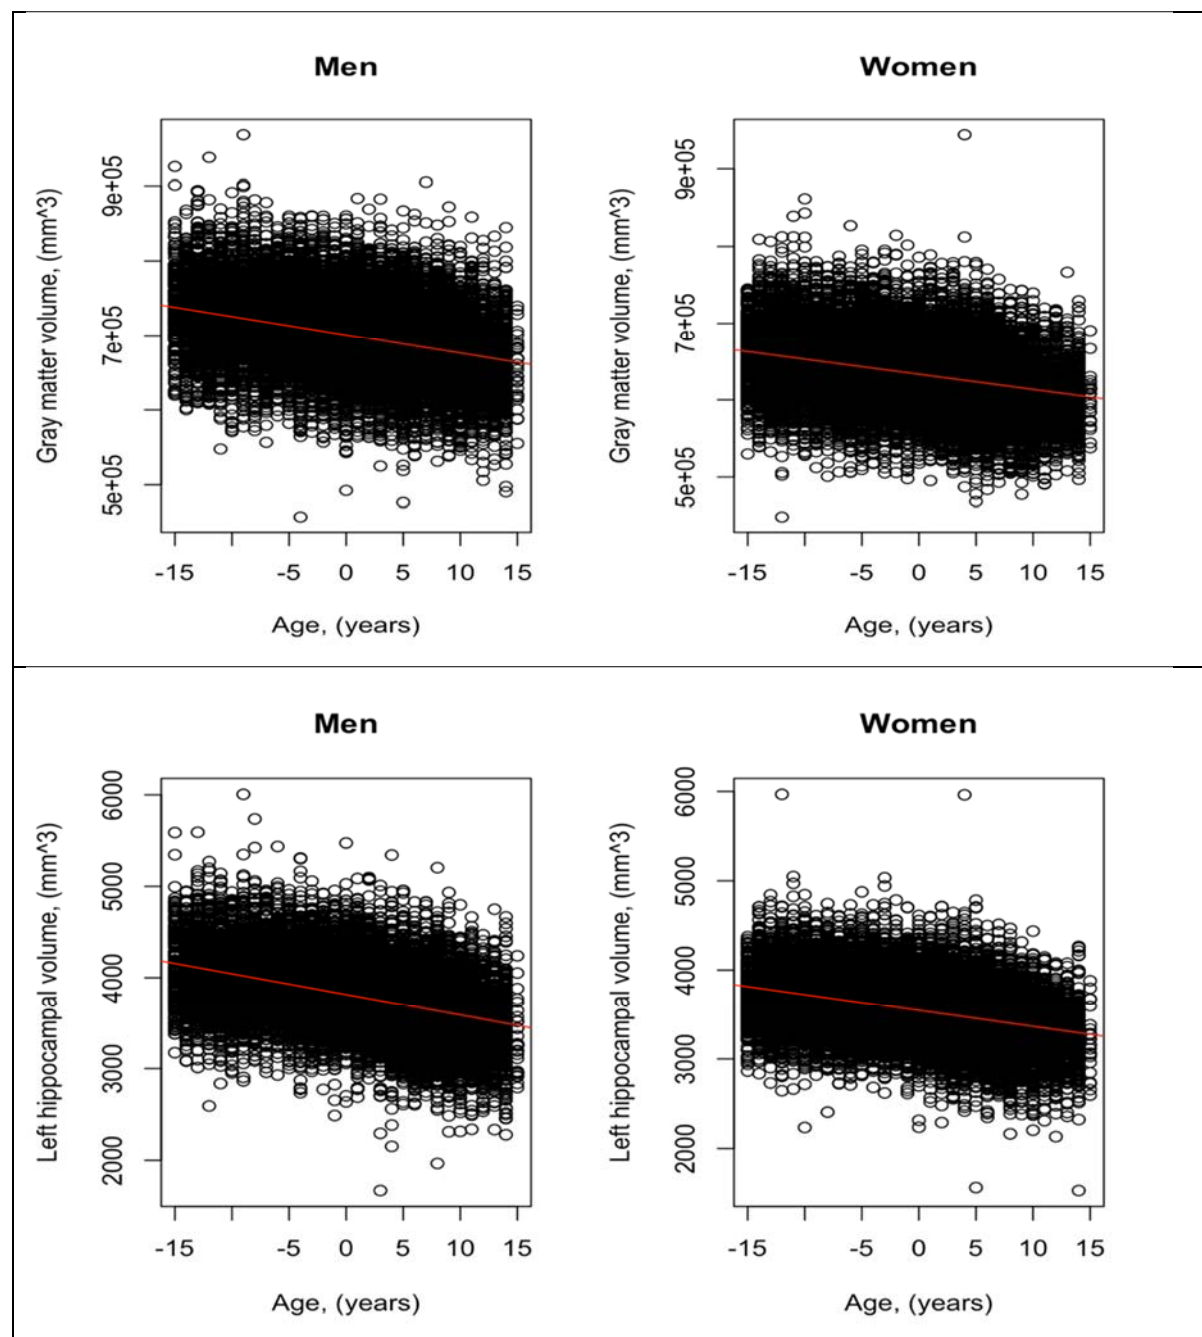

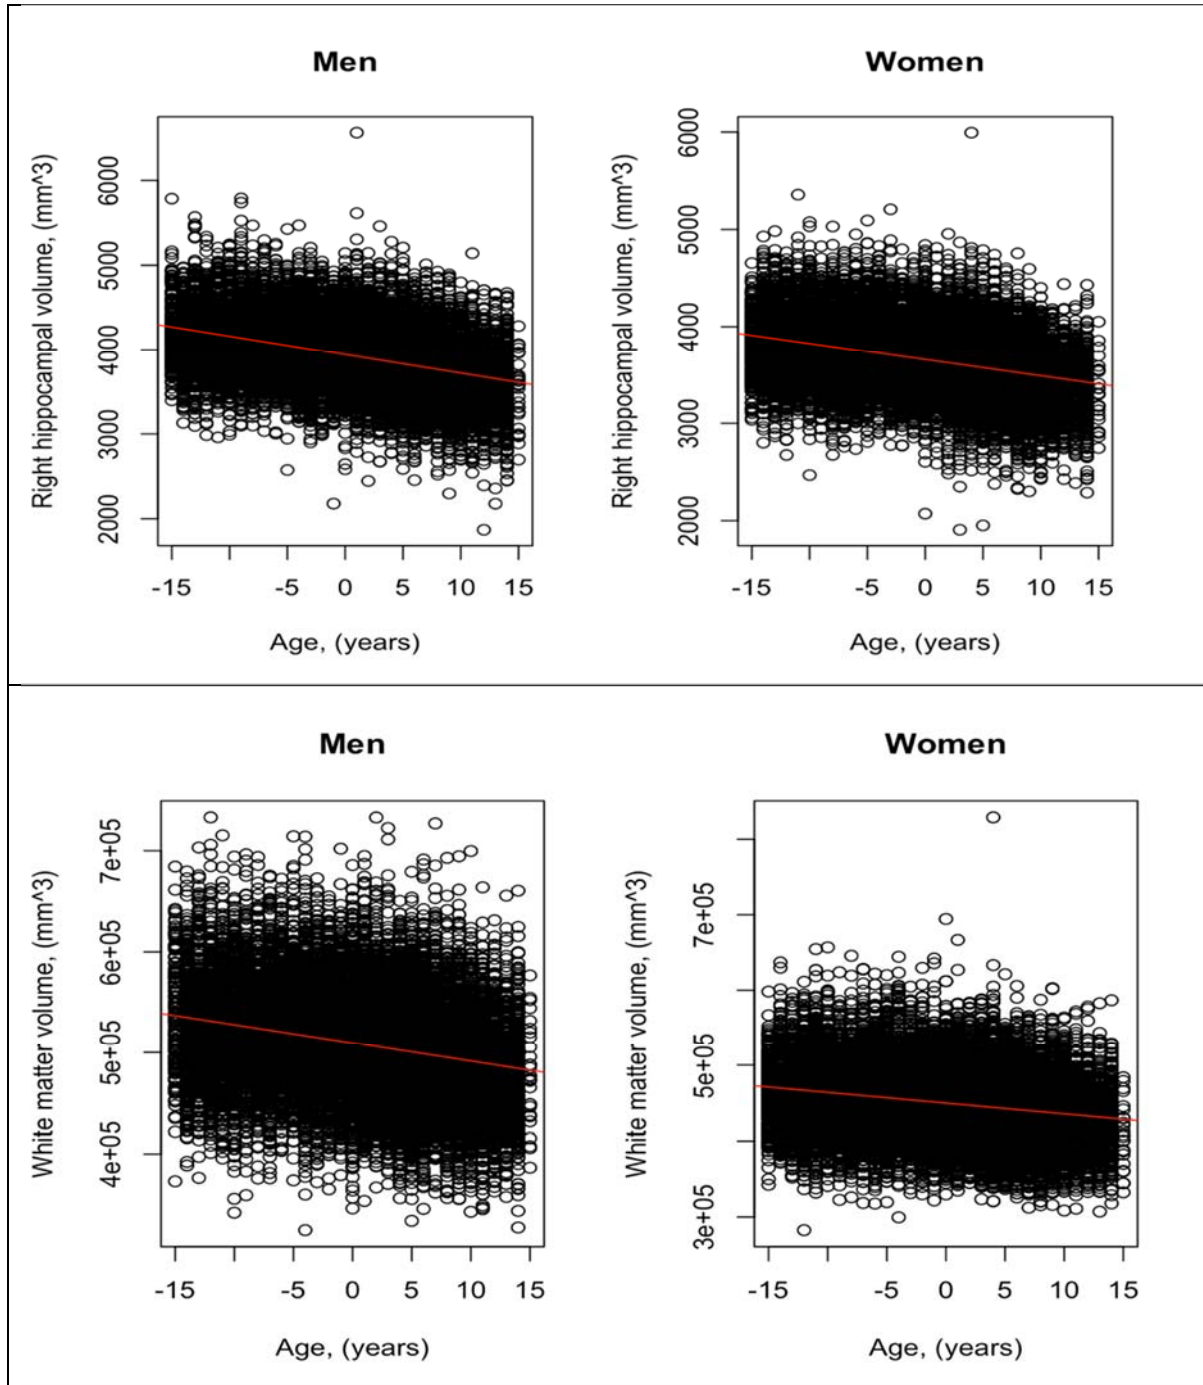

**Figure S1.** Scattered plot shows the distribution of the brain volumes across age in men and women.

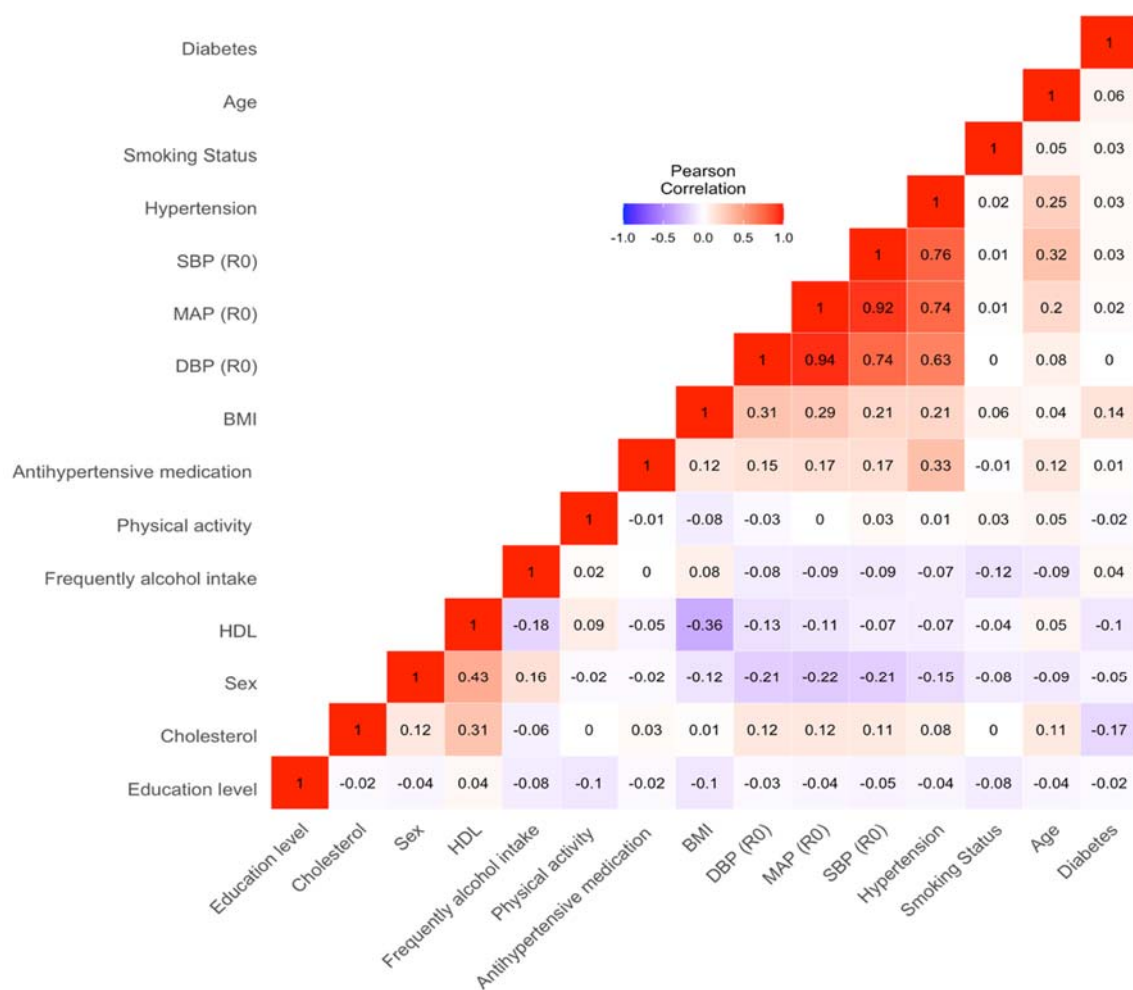

**Figure S2.** Bivariate correlation matrix between BP measurements and main covariates

**Table S1. Interaction between BP (MAP, SBP, DBP), antihypertensive medication, and brain volumes across age groups in men and women at UK biobank study.**

|                                  | Gray Matter volume<br>(mm <sup>3</sup> ) |                          | White matter volume<br>(mm <sup>3</sup> ) |                           | Left Hippocampus<br>volume (mm <sup>3</sup> ) |                     | Right Hippocampus<br>volume (mm <sup>3</sup> ) |                     | White matter lesions volume<br>(mm <sup>3</sup> ) |                     |
|----------------------------------|------------------------------------------|--------------------------|-------------------------------------------|---------------------------|-----------------------------------------------|---------------------|------------------------------------------------|---------------------|---------------------------------------------------|---------------------|
|                                  | Beta (SE)                                |                          | Beta (SE)                                 |                           | Beta (SE)                                     |                     | Beta (SE)                                      |                     | Beta (SE)                                         |                     |
| Participants aged ≤45 years      |                                          |                          |                                           |                           |                                               |                     |                                                |                     |                                                   |                     |
|                                  | Men,<br>n=2220                           | Women,<br>n=2867         | Men,<br>n=2220                            | Women,<br>n=2867          | Men,<br>n=2220                                | Women,<br>n=2867    | Men,<br>n=2220                                 | Women,<br>n=2867    | Men,<br>n=2220                                    | Women,<br>n=2867    |
| MAP                              | -253.756***<br>(63.218)                  | -239.306***<br>(48.302)  | 4.574<br>(64.455)                         | -121.733**<br>(48.375)    | 1.015<br>(0.677)                              | -1.206**<br>(0.526) | 0.729 (0.685)                                  | -1.154**<br>(0.522) | 0.003***<br>(0.001)                               | 0.003***<br>(0.001) |
| Antihypertensive medication      | 10,736.320<br>(8,364.695)                | 6,953.476<br>(5,730.181) | -6,220.868<br>(8,528.338)                 | -7,673.860<br>(5,738.851) | 89.592<br>(89.528)                            | -24.431<br>(62.348) | 111.500<br>(90.686)                            | -59.839<br>(61.983) | 0.184* (0.108)                                    | 0.072 (0.083)       |
| MAPX antihypertensive medication | -582.093<br>(387.614)                    | -269.292<br>(294.586)    | 110.401<br>(395.197)                      | 429.391<br>(295.032)      | -6.599<br>(4.149)                             | 1.888 (3.205)       | -5.706 (4.202)                                 | 3.684 (3.187)       | -0.004 (0.005)                                    | -0.003 (0.004)      |
| SBP                              | -167.489***<br>(48.291)                  | -168.342***<br>(35.741)  | -0.293<br>(49.182)                        | -92.447***<br>(35.781)    | 0.946*<br>(0.516)                             | -0.672*<br>(0.389)  | 0.971* (0.523)                                 | -0.590<br>(0.387)   | 0.002***<br>(0.001)                               | 0.002***<br>(0.001) |
| Antihypertensive medication      | 17,605.070<br>(10,811.920)               | 5,772.999<br>(5,736.367) | 9,034.142<br>(11,011.450)                 | -5,983.785<br>(5,742.761) | 231.027**<br>(115.522)                        | -31.935<br>(62.409) | 229.638**<br>(117.014)                         | -72.332<br>(62.044) | 0.198 (0.140)                                     | 0.111 (0.083)       |
| SBPX antihypertensive medication | -632.666*<br>(343.978)                   | -143.318<br>(197.242)    | -445.209<br>(350.326)                     | 208.438<br>(197.462)      | -9.147**<br>(3.675)                           | 1.389 (2.146)       | -7.882**<br>(3.723)                            | 2.779 (2.133)       | -0.003 (0.004)                                    | -0.004 (0.003)      |
| DBP                              | -272.067***<br>(67.772)                  | -251.103***<br>(53.464)  | 8.383<br>(69.063)                         | -119.825**<br>(53.525)    | 0.818<br>(0.726)                              | -1.463**<br>(0.581) | 0.300 (0.735)                                  | -1.459**<br>(0.578) | 0.003***<br>(0.001)                               | 0.003***<br>(0.001) |
| Antihypertensive medication      | 7,226.912<br>(7,460.247)                 | 7,268.042<br>(6,044.473) | -11,410.250<br>(7,602.306)                | -9,553.892<br>(6,051.337) | 31.639<br>(79.870)                            | -19.289<br>(65.724) | 62.570<br>(80.896)                             | -48.780<br>(65.339) | 0.177* (0.097)                                    | 0.041 (0.088)       |
| DBPX                             | -465.765<br>(385.695)                    | -334.602<br>(350.222)    | 439.600<br>(393.039)                      | 589.543*<br>(350.620)     | -3.974<br>(4.129)                             | 1.756 (3.808)       | -3.370 (4.182)                                 | 3.334 (3.786)       | -0.004 (0.005)                                    | -0.001 (0.005)      |

antihypertensive  
medication

| Participants aged between 46-55 years  |                                    |                            |                             |                           |                       |                       |                         |                      |                      |                      |
|----------------------------------------|------------------------------------|----------------------------|-----------------------------|---------------------------|-----------------------|-----------------------|-------------------------|----------------------|----------------------|----------------------|
|                                        | Men,<br>n=5699                     | Women,<br>n=7456           | Men,<br>n=5699              | Women,<br>n=7456          | Men,<br>n=5699        | Women,<br>n=7456      | Men,<br>n=5699          | Women,<br>n=7456     | Men,<br>n=5699       | Women,<br>n=7456     |
| MAP                                    | -221.478***<br>(39.579)            | -225.116***<br>(27.107)    | -119.315***<br>(38.578)     | -61.891**<br>(27.997)     | -0.538<br>(0.405)     | -0.249<br>(0.291)     | -0.416 (0.409)          | -0.368<br>(0.288)    | 0.006***<br>(0.001)  | 0.007***<br>(0.001)  |
| Antihypertensive<br>medication         | -9,138.201***<br>(3,446.335)       | -2,998.427<br>(2,326.933)  | -7,549.108**<br>(3,359.214) | -1,829.803<br>(2,403.383) | -77.124**<br>(35.233) | -52.064**<br>(25.013) | -92.939***<br>(35.648)  | -42.420*<br>(24.739) | 0.099* (0.053)       | 0.074* (0.044)       |
| MAPX<br>antihypertensive<br>medication | 174.165<br>(172.530)               | -71.032<br>(122.745)       | 65.078<br>(168.168)         | 20.968<br>(126.778)       | 1.674<br>(1.764)      | 0.265 (1.319)         | 2.443 (1.785)           | -0.003<br>(1.305)    | 0.001 (0.003)        | 0.002 (0.002)        |
| SBP                                    | -141.922***<br>(28.579)            | -148.837***<br>(18.582)    | -87.669***<br>(27.839)      | -8.915<br>(19.192)        | -0.153<br>(0.292)     | -0.064<br>(0.200)     | -0.130 (0.295)          | -0.086<br>(0.198)    | 0.004***<br>(0.0004) | 0.005***<br>(0.0003) |
| Antihypertensive<br>medication         | -<br>10,520.590**<br>* (3,791.735) | -3,063.157<br>(2,550.758)  | -8,700.389**<br>(3,693.626) | -2,089.413<br>(2,634.558) | -93.992**<br>(38.743) | -50.036*<br>(27.412)  | -116.641***<br>(39.195) | -44.898*<br>(27.113) | 0.106* (0.058)       | 0.080* (0.048)       |
| SBPX<br>antihypertensive<br>medication | 144.948<br>(120.108)               | -45.338<br>(81.446)        | 77.874<br>(117.001)         | 4.081 (84.122)            | 1.540<br>(1.227)      | 0.022 (0.875)         | 2.276* (1.242)          | 0.001 (0.866)        | 0.001 (0.002)        | 0.001 (0.002)        |
| DBP                                    | -245.404****<br>(44.291)           | -243.326****<br>(31.612)   | -118.727***<br>(43.176)     | -113.206****<br>(32.610)  | -0.829*<br>(0.453)    | -0.415<br>(0.340)     | -0.626 (0.458)          | -0.626*<br>(0.336)   | 0.006****<br>(0.001) | 0.008****<br>(0.001) |
| Antihypertensive<br>medication         | -8,350.592**<br>(3,260.427)        | -3,789.582*<br>(2,200.205) | -6,946.588**<br>(3,178.400) | -1,709.401<br>(2,269.659) | -63.223*<br>(33.327)  | -53.449**<br>(23.632) | -72.957**<br>(33.725)   | -41.396*<br>(23.371) | 0.110**<br>(0.050)   | 0.094** (0.041)      |
| DBPX<br>antihypertensive<br>medication | 153.368<br>(192.681)               | -48.831<br>(140.824)       | 30.380<br>(187.834)         | 39.076<br>(145.270)       | 1.153<br>(1.970)      | 0.506 (1.513)         | 1.637 (1.993)           | 0.018 (1.496)        | 0.001 (0.003)        | 0.001 (0.003)        |
| Participants aged between 56-65 years  |                                    |                            |                             |                           |                       |                       |                         |                      |                      |                      |
|                                        | Men,<br>n=7708                     | Women,<br>n=7692           | Men,<br>n=7708              | Women,<br>n=7692          | Men,<br>n=7708        | Women,<br>n=7692      | Men,<br>n=7708          | Women,<br>n=7692     | Men,<br>n=7708       | Women,<br>n=7692     |

|                                       |                              |                               |                              |                            |                      |                     |                      |                     |                      |                      |
|---------------------------------------|------------------------------|-------------------------------|------------------------------|----------------------------|----------------------|---------------------|----------------------|---------------------|----------------------|----------------------|
| MAP                                   | -179.243***<br>(34.484)      | -170.099***<br>(29.764)       | -74.477**<br>(34.563)        | -89.883***<br>(30.146)     | -0.230<br>(0.364)    | -0.292<br>(0.318)   | 0.031 (0.371)        | -0.447<br>(0.320)   | 0.009***<br>(0.001)  | 0.009***<br>(0.001)  |
| Antihypertensive medication           | -5,871.521**<br>(2,368.242)  | -5,915.991***<br>(1,842.628)  | -6,716.384***<br>(2,373.675) | -2,567.880<br>(1,866.239)  | -39.313<br>(24.995)  | -3.128<br>(19.717)  | -44.987*<br>(25.445) | 4.338<br>(19.781)   | 0.245***<br>(0.046)  | 0.228***<br>(0.042)  |
| MAPX antihypertensive medication      | 65.252<br>(120.682)          | 117.197<br>(102.060)          | 192.206<br>(120.958)         | -51.427<br>(103.368)       | 0.559<br>(1.274)     | -1.393<br>(1.092)   | 0.630 (1.297)        | -1.342<br>(1.096)   | -0.006***<br>(0.002) | -0.004* (0.002)      |
| SBP                                   | -145.078***<br>(22.678)      | -102.494***<br>(18.682)       | -51.153**<br>(22.750)        | -59.992***<br>(18.918)     | -0.340<br>(0.240)    | -0.243<br>(0.200)   | -0.091 (0.244)       | -0.291<br>(0.200)   | 0.006***<br>(0.0004) | 0.006***<br>(0.0004) |
| Antihypertensive medication           | -7,597.765***<br>(2,701.247) | -5,736.028***<br>(2,141.589)  | -6,389.681**<br>(2,709.862)  | -2,741.243<br>(2,168.619)  | -50.945*<br>(28.532) | 9.122<br>(22.910)   | -54.738*<br>(29.048) | 18.927<br>(22.984)  | 0.253***<br>(0.053)  | 0.242***<br>(0.049)  |
| SBPX antihypertensive medication      | 91.287<br>(76.925)           | 48.198<br>(62.436)            | 92.552<br>(77.171)           | -20.251<br>(63.225)        | 0.697<br>(0.813)     | -1.082<br>(0.668)   | 0.667 (0.827)        | -1.151*<br>(0.670)  | -0.003**<br>(0.002)  | -0.002 (0.001)       |
| DBP                                   | -139.146****<br>(40.429)     | -182.269****<br>(35.954)      | -72.275*<br>(40.485)         | -85.518**<br>(36.407)      | 0.065<br>(0.426)     | -0.189<br>(0.385)   | 0.208 (0.434)        | -0.438<br>(0.386)   | 0.008****<br>(0.001) | 0.010****<br>(0.001) |
| Antihypertensive medication           | -5,014.314**<br>(2,082.230)  | -6,073.270****<br>(1,560.044) | -6,453.186***<br>(2,085.096) | -2,985.786*<br>(1,579.697) | -31.034<br>(21.956)  | -17.182<br>(16.688) | -36.877*<br>(22.350) | -11.228<br>(16.743) | 0.238****<br>(0.041) | 0.233****<br>(0.036) |
| DBPX antihypertensive medication      | -1.233<br>(140.241)          | 173.790<br>(117.737)          | 241.160*<br>(140.434)        | -51.779<br>(119.220)       | 0.006<br>(1.479)     | -0.797<br>(1.259)   | 0.170 (1.505)        | -0.545<br>(1.264)   | -0.007***<br>(0.003) | -0.006**<br>(0.003)  |
| <b>Participants aged &gt;65 years</b> |                              |                               |                              |                            |                      |                     |                      |                     |                      |                      |
|                                       | Men,<br>n=1541               | Women,<br>n=1077              | Men,<br>n=1541               | Women,<br>n=1077           | Men,<br>n=1541       | Women,<br>n=1077    | Men,<br>n=1541       | Women,<br>n=1077    | Men,<br>n=1541       | Women,<br>n=1077     |
| MAP                                   | -155.441*<br>(79.747)        | -148.297*<br>(77.770)         | -70.501<br>(77.678)          | 26.134<br>(81.717)         | -1.174<br>(0.807)    | 1.592*<br>(0.849)   | -1.680**<br>(0.839)  | 1.073 (0.822)       | 0.009***<br>(0.002)  | 0.010***<br>(0.002)  |
| Antihypertensive medication           | -2,411.661<br>(4,986.035)    | -4,363.604<br>(4,150.917)     | 782.638<br>(4,856.624)       | -514.460<br>(4,361.551)    | -40.734<br>(50.458)  | -18.131<br>(45.288) | -70.617<br>(52.472)  | -26.950<br>(43.860) | 0.227**<br>(0.107)   | 0.331***<br>(0.111)  |

|                                        |                           |                           |                          |                           |                      |                     |                      |                     |                      |                      |
|----------------------------------------|---------------------------|---------------------------|--------------------------|---------------------------|----------------------|---------------------|----------------------|---------------------|----------------------|----------------------|
| MAPX<br>antihypertensive<br>medication | 257.642<br>(245.861)      | 52.635<br>(229.188)       | 141.962<br>(239.480)     | -27.067<br>(240.818)      | 3.399<br>(2.488)     | -0.971<br>(2.501)   | 5.161**<br>(2.587)   | 0.905 (2.422)       | -0.0003<br>(0.005)   | -0.013**<br>(0.006)  |
| SBP                                    | -55.179<br>(49.730)       | -51.515<br>(48.786)       | -7.678<br>(48.415)       | 16.477<br>(51.191)        | -0.016<br>(0.503)    | 1.184**<br>(0.531)  | -0.427 (0.523)       | 0.735 (0.515)       | 0.005***<br>(0.001)  | 0.006***<br>(0.001)  |
| Antihypertensive<br>medication         | -3,290.270<br>(5,946.494) | -4,518.298<br>(5,231.465) | 1,421.212<br>(5,789.182) | 2,135.564<br>(5,489.312)  | -75.655<br>(60.131)  | -2.529<br>(56.968)  | -91.064<br>(62.581)  | -25.431<br>(55.203) | 0.330***<br>(0.127)  | 0.434***<br>(0.140)  |
| SBPX<br>antihypertensive<br>medication | 139.577<br>(148.142)      | 18.345<br>(139.363)       | 43.781<br>(144.223)      | -91.102<br>(146.232)      | 2.457<br>(1.498)     | -0.932<br>(1.518)   | 2.917* (1.559)       | 0.337 (1.471)       | -0.003 (0.003)       | -0.009**<br>(0.004)  |
| DBP                                    | -233.480**<br>(95.639)    | -224.696**<br>(92.970)    | -138.032<br>(93.176)     | 26.304<br>(97.781)        | -2.508***<br>(0.967) | 1.260 (1.016)       | -2.837***<br>(1.006) | 0.964 (0.984)       | 0.009****<br>(0.002) | 0.012****<br>(0.002) |
| Antihypertensive<br>medication         | -813.451<br>(3,996.848)   | -4,193.422<br>(3,282.286) | 1,119.898<br>(3,893.926) | -1,779.415<br>(3,452.160) | -4.091<br>(40.425)   | -25.752<br>(35.883) | -34.069<br>(42.053)  | -20.926<br>(34.733) | 0.191**<br>(0.086)   | 0.240***<br>(0.088)  |
| DBPX<br>antihypertensive<br>medication | 282.305<br>(289.778)      | 83.703<br>(273.102)       | 216.338<br>(282.316)     | 117.245<br>(287.237)      | 2.411<br>(2.931)     | -0.423<br>(2.986)   | 5.261* (3.049)       | 1.174 (2.890)       | 0.004 (0.006)        | -0.012* (0.007)      |

.\* p<0.05; \*\* p<0.01; \*\*\* p<0.001

*Note:* Hierarchical linear regression models were used to quantify the correlation (Beta, and SE, standard error) between mean arterial pressure; MAP and brain volumes, while adjusting for basic covariates: total intracranial volume, and main covariates: HDL, cholesterol, diabetes, smoking status, higher education, physical activity, alcohol intake, antihypertensive medication and tested for the statistical interactions between (BP × antihypertensive medication) in predicting brain volume measures in model 2. Note: for ease of interpretation, we exponentiated the coefficients to produce the proportionate effect of a 10 mm Hg higher blood pressure on mean brain volume for each brain region in men and women. For instance, an exponentiated coefficient of 1.1 reflects a 10% increase in mean brain volume.

Table S2. Association between baseline adjusted SBP by PP and brain volumes across age groups in men and women at UK biobank study.

|                                       | Grey Matter volume (mm <sup>3</sup> ) |                          | White matter volume (mm <sup>3</sup> ) |                         | Left Hippocampus volume (mm <sup>3</sup> ) |                     | Right Hippocampus volume (mm <sup>3</sup> ) |                      | White matter lesions volume (mm <sup>3</sup> ) |                      |
|---------------------------------------|---------------------------------------|--------------------------|----------------------------------------|-------------------------|--------------------------------------------|---------------------|---------------------------------------------|----------------------|------------------------------------------------|----------------------|
|                                       | Beta (SE)                             |                          | Beta (SE)                              |                         | Beta (SE)                                  |                     | Beta (SE)                                   |                      | Beta (SE)                                      |                      |
| Participants aged ≤ 45 years          |                                       |                          |                                        |                         |                                            |                     |                                             |                      |                                                |                      |
|                                       | Men, n=2220                           | Women, n=2867            | Men, n=2220                            | Women, n=2867           | Men, n=2220                                | Women, n=2867       | Men, n=2220                                 | Women, n=2867        | Men, n=2220                                    | Women, n=2867        |
| Non adjusted SBP                      | -179.415***<br>(47.880)               | -172.891***<br>(35.186)  | -8.685<br>(48.744)                     | -85.832**<br>(35.229)   | 0.773 (0.512)                              | -0.628 (0.383)      | 0.823<br>(0.518)                            | -0.502 (0.381)       | 0.002***<br>(0.001)                            | 0.002*** (0.001)     |
| Adjusted SBP                          | -281.000***<br>(67.193)               | -238.224***<br>(54.218)  | 25.600<br>(68.470)                     | -91.508*<br>(54.307)    | 0.619 (0.719)                              | -1.497**<br>(0.590) | 0.046<br>(0.728)                            | -1.519***<br>(0.586) | 0.003***<br>(0.001)                            | 0.003*** (0.001)     |
| PP                                    | -83.378<br>(76.041)                   | -154.546***<br>(57.156)  | -48.851<br>(77.183)                    | -100.699*<br>(57.086)   | 1.036 (0.811)                              | 0.005 (0.620)       | 1.803**<br>(0.820)                          | 0.292 (0.617)        | 0.002*<br>(0.001)                              | 0.001 (0.001)        |
| Participants aged between 46-55 years |                                       |                          |                                        |                         |                                            |                     |                                             |                      |                                                |                      |
|                                       | Men, n=5699                           | Women, n=7456            | Men, n=5699                            | Women, n=7456           | Men, n=5699                                | Women, n=7456       | Men, n=5699                                 | Women, n=7456        | Men, n=5699                                    | Women, n=7456        |
| Non adjusted SBP                      | -133.847***<br>(27.786)               | -151.197***<br>(18.091)  | -83.331***<br>(27.064)                 | -8.702 (18.685)         | -0.067<br>(0.284)                          | -0.062 (0.194)      | -0.003<br>(0.287)                           | -0.086 (0.192)       | 0.004***<br>(0.0004)                           | 0.005***<br>(0.0003) |
| Adjusted SBP                          | -229.585***<br>(44.219)               | -213.428***<br>(32.223)  | -103.752**<br>(43.099)                 | -146.406***<br>(33.237) | -0.945**<br>(0.452)                        | -0.486 (0.346)      | -0.690<br>(0.457)                           | -0.791**<br>(0.342)  | 0.006***<br>(0.001)                            | 0.007*** (0.001)     |
| PP                                    | -86.948**<br>(43.488)                 | -154.736****<br>(27.663) | -85.156**<br>(42.308)                  | 68.952**<br>(28.487)    | 0.614 (0.444)                              | 0.167 (0.297)       | 0.540<br>(0.449)                            | 0.300 (0.293)        | 0.003****<br>(0.001)                           | 0.005****<br>(0.001) |
| Participants aged between 56-65 years |                                       |                          |                                        |                         |                                            |                     |                                             |                      |                                                |                      |
|                                       | Men, n=7708                           | Women, n=7692            | Men, n=7708                            | Women, n=7692           | Men, n=7708                                | Women, n=7692       | Men, n=7708                                 | Women, n=7692        | Men, n=7708                                    | Women, n=7692        |
| Non adjusted SBP                      | -137.254***<br>(21.699)               | -98.180***<br>(17.826)   | -43.220**<br>(21.768)                  | -61.805***<br>(18.050)  | -0.280<br>(0.229)                          | -0.339* (0.191)     | -0.034<br>(0.233)                           | -0.394**<br>(0.191)  | 0.005***<br>(0.0004)                           | 0.006***<br>(0.0004) |



|                                        |                         |                         |                      |                        |                      |                  |                      |                  |                     |                     |
|----------------------------------------|-------------------------|-------------------------|----------------------|------------------------|----------------------|------------------|----------------------|------------------|---------------------|---------------------|
| Adjusted SBP                           | -90.754**<br>(39.736)   | -141.865***<br>(35.175) | -39.446<br>(39.868)  | -71.873**<br>(35.622)  | 0.249 (0.420)        | -0.109 (0.376)   | 0.296<br>(0.427)     | -0.352 (0.378)   | 0.006***<br>(0.001) | 0.008*** (0.001)    |
| PP                                     | -185.065***<br>(30.536) | -96.567***<br>(24.055)  | -52.833*<br>(30.629) | -67.790***<br>(24.341) | -0.594*<br>(0.322)   | -0.487* (0.257)  | -0.205<br>(0.328)    | -0.476* (0.258)  | 0.006***<br>(0.001) | 0.006***<br>(0.001) |
| <b>Participants aged &gt; 65 years</b> |                         |                         |                      |                        |                      |                  |                      |                  |                     |                     |
|                                        | Men,<br>n=1541          | Women,<br>n=1077        | Men,<br>n=1541       | Women,<br>n=1077       | Men, n=1541          | Women,<br>n=1077 | Men,<br>n=1541       | Women,<br>n=1077 | Men,<br>n=1541      | Women, n=1077       |
| Non adjusted<br>SBP                    | -39.328<br>(46.797)     | -49.280<br>(45.713)     | -2.706<br>(45.547)   | 5.374 (47.974)         | 0.263 (0.473)        | 1.070** (0.498)  | -0.096<br>(0.493)    | 0.776 (0.482)    | 0.005***<br>(0.001) | 0.005*** (0.001)    |
| Adjusted SBP                           | -219.645**<br>(92.221)  | -230.294**<br>(89.603)  | -134.598<br>(89.824) | 44.540 (94.270)        | -2.811***<br>(0.930) | 0.850 (0.978)    | -2.639***<br>(0.970) | 0.879 (0.948)    | 0.009***<br>(0.002) | 0.010*** (0.002)    |
| PP                                     | 26.177<br>(61.855)      | 16.100<br>(60.908)      | 48.836<br>(60.179)   | -9.546 (63.888)        | 1.509**<br>(0.625)   | 1.315** (0.663)  | 0.892<br>(0.651)     | 0.849 (0.643)    | 0.004***<br>(0.001) | 0.003* (0.002)      |
| .* p<0.05; ** p<0.01; *** p<0.001      |                         |                         |                      |                        |                      |                  |                      |                  |                     |                     |

*Note:* Abbreviations: MAP, mean arterial pressure; SBP, systolic blood pressure; DBP, diastolic blood pressure. Model 1 was adjusted for total intracranial volume, and main covariates: HDL, cholesterol, diabetes, smoking status, higher education, physical activity, alcohol intake, and antihypertensive medication. Note: for ease of interpretation, we exponentiated the coefficients to produce the proportionate effect of a 10 mm Hg higher blood pressure on mean brain volume for each brain region in men and women. For instance, an exponentiated coefficient of 1.1 reflects a 10% increase in mean brain volume.
